# Supplementary material for: Exploring the interaction between Salvia miltiorrhiza and xanthine oxidase: insights from computational analysis and experimental studies combined with enzyme channel blocking
Source: Royal Society of Chemistry journal article supplement (doi:10.1039/c6ra24396g), 2016-01-01
Supplement: c6ra24396g1.pdf [file c6ra24396g1.pdf]

## Supplementary material

### **Exploring the interaction between *Salvia miltiorrhiza* and xanthine oxidase: Insights from computational analysis and experimental studies combined with enzyme channel blocking**

Hongjin Tang<sup>a</sup>, Lin Yang<sup>a</sup>, Wei Li<sup>a</sup>, Jiahuang Li<sup>b</sup>, Jun Chen<sup>a,\*</sup>

<sup>a</sup> *State Key Laboratory of Natural Medicines, China Pharmaceutical University,  
Nanjing 210009, P. R. China*

<sup>b</sup> *State Key Laboratory of Pharmaceutical Biotechnology, Nanjing University,  
Nanjing 210023, P. R. China*

---

*Abbreviations:* ROS, reactive oxygen species; XO, xanthine oxidase; ECB, enzyme channel blocking; RMSD, root mean square deviation; Mo-pt, molybdenum-pterin.

\* Corresponding author. Tel.: +86-25-8327-1382; Fax: +86-25-8327-1379 (J. Chen);  
*E-mail address:* chenj2002cpu@126.com (J. Chen).

**Table A1** The list of chemicals identified in *Salvia miltiorrhiza* and their docking scores when binding to the active site of XO

| No. | Compound name                   | Total score | Crash   | Polar  | Similarity | Cscore |
|-----|---------------------------------|-------------|---------|--------|------------|--------|
| 36  | Lithospermic acid               | 8.3944      | -4.9245 | 4.6823 | 0.489      | 5      |
| 60  | Rosmarinic acid                 | 7.8221      | -4.3792 | 5.9801 | 0.560      | 5      |
| 67  | Salvianolic acid D              | 7.4581      | -2.8659 | 3.4154 | 0.451      | 3      |
| 66  | Salvianolic acid C              | 7.2273      | -1.7861 | 2.8672 | 0.506      | 5      |
| 64  | Salvianolic acid A              | 6.7127      | -0.5927 | 3.0305 | 0.564      | 4      |
| 56  | Protocatechuic aldehyde         | 6.486       | -0.5114 | 4.7028 | 0.578      | 4      |
| 29  | Isoferulic acid                 | 6.4479      | -1.0147 | 2.322  | 0.569      | 5      |
| 38  | Methyl rosmarinate              | 6.4082      | -1.0099 | 2.4675 | 0.606      | 3      |
| 73  | Salvinal                        | 6.311       | -2.4227 | 2.3573 | 0.439      | 3      |
| 9   | Caffeic acid                    | 5.9897      | -0.4422 | 3.0594 | 0.558      | 4      |
| 55  | Protocatechuic acid             | 5.8856      | -0.3942 | 3.5676 | 0.606      | 3      |
| 86  | Tanshinone I                    | 5.7885      | -0.6277 | 1.0357 | 0.323      | 5      |
| 84  | Tanshinol A                     | 5.7519      | -2.0567 | 1.7557 | 0.391      | 4      |
| 96  | Salvianic acid A                | 5.6747      | -4.4618 | 3.8229 | 0.507      | 4      |
| 69  | Salvianolic acid F              | 5.4057      | -1.6401 | 2.4885 | 0.522      | 3      |
| 6   | Ailanthoidol                    | 5.3489      | -0.8669 | 1.0973 | 0.387      | 3      |
| 58  | Przewaquinone B                 | 5.2951      | -1.8829 | 3.0771 | 0.336      | 4      |
| 8   | Baicalin                        | 5.293       | -5.566  | 4.3101 | 0.521      | 5      |
| 30  | Isoimperatorin                  | 5.1775      | -1.1061 | 0.8784 | 0.358      | 2      |
| 20  | Dihydrotanshinone I             | 5.1641      | -1.8317 | 1.0977 | 0.348      | 3      |
| 39  | Methyl salvianolic acid C       | 4.8022      | -3.6735 | 2.9717 | 0.593      | 2      |
| 33  | Isotanshinone IIA               | 4.5321      | -1.0001 | 1.0439 | 0.291      | 4      |
| 90  | Trijuganone A                   | 4.364       | -3.474  | 1.3032 | 0.496      | 5      |
| 51  | Neosalvianen                    | 4.3611      | -1.0253 | 0.9748 | 0.276      | 2      |
| 18  | Dihydroisotanshinone I          | 4.3384      | -1.5276 | 1.1045 | 0.351      | 2      |
| 42  | Methylenedihydrotan-shinquinone | 4.3033      | -4.011  | 0.7991 | 0.418      | 5      |
| 32  | Isotanshinone I                 | 4.1677      | -2.3586 | 0.7497 | 0.398      | 5      |
| 95  | Tetrahydrotanshinone            | 4.1455      | -4.3783 | 0.8341 | 0.421      | 4      |
| 91  | Trijuganone B                   | 4.1455      | -4.3783 | 0.8341 | 0.421      | 4      |
| 63  | Salvianen                       | 4.0879      | -1.0698 | 1.0155 | 0.278      | 2      |
| 31  | Isosalvianolic acid C           | 4.0649      | -1.4141 | 1.7252 | 0.468      | 2      |
| 24  | Ethyl lithospermate             | 3.9946      | -3.3855 | 2.7249 | 0.514      | 4      |
| 3   | 1,2-Dihydrotanshinone I         | 3.8467      | -0.459  | 1.0279 | 0.284      | 2      |
| 57  | Przewaquinone A                 | 3.8284      | -0.5256 | 1.0466 | 0.314      | 2      |
| 1   | 1,2,5,6-Tetrahydrotanshinone I  | 3.6495      | -4.4866 | 0.8352 | 0.422      | 5      |
| 85  | Tanshinol B                     | 3.5862      | -0.5533 | 0.8442 | 0.204      | 2      |
| 48  | Monomethyl lithospermate        | 3.5588      | -2.1249 | 2.587  | 0.397      | 2      |
| 71  | Salvianolic acid I              | 3.3552      | -3.7372 | 1.9153 | 0.544      | 5      |
| 50  | Neo-przewaquinone A             | 3.2339      | -0.4712 | 1.1654 | 0.282      | 2      |

|    |                                    |         |         |        |       |   |
|----|------------------------------------|---------|---------|--------|-------|---|
| 72 | Salvianolic acid J                 | 3.1838  | -4.0033 | 2.8277 | 0.591 | 2 |
| 41 | Methylene tanshinquinone           | 3.1771  | -1.7713 | 1.0656 | 0.267 | 2 |
| 15 | Danshenxinkun C                    | 3.1385  | -1.7703 | 0.8681 | 0.347 | 2 |
| 26 | Formyltanshinone                   | 3.0835  | -2.7299 | 2.6277 | 0.331 | 2 |
| 14 | Danshenxinkun B                    | 2.9203  | -6.2017 | 0.0027 | 0.429 | 3 |
| 83 | Tanshinlactone                     | 2.8011  | -2.5449 | 0.0246 | 0.279 | 3 |
| 53 | Nortanshinone                      | 2.7455  | -2.4192 | 2.0959 | 0.33  | 5 |
| 2  | 1,2-Didehydromiltirone             | 2.5469  | -0.8633 | 0.0043 | 0.221 | 2 |
| 74 | Salviolone                         | 2.359   | -1.522  | 0.0002 | 0.315 | 2 |
| 21 | Dimethyl lithospermate             | 2.3413  | -6.6067 | 2.6944 | 0.536 | 2 |
| 4  | 1-Ketoisocryptotanshinone          | 2.3259  | -1.2388 | 0.5983 | 0.305 | 2 |
| 61 | Salviaflaside                      | 2.2305  | -4.1102 | 1.7061 | 0.602 | 2 |
| 13 | Danshenxinkun A                    | 2.2054  | -5.0723 | 1.484  | 0.463 | 2 |
| 22 | Epicryptoacetalide                 | 2.1485  | -1.515  | 0      | 0.156 | 2 |
| 49 | Neocryptotanshinone                | 2.0995  | -3.8463 | 0.8266 | 0.414 | 2 |
| 87 | Tanshinone IIA                     | 2.0646  | -7.4906 | 1.5611 | 0.514 | 5 |
| 62 | Salvianan                          | 1.747   | -1.0248 | 0      | 0.214 | 2 |
| 40 | Methyl tanshinonate                | 1.7341  | -7.3313 | 1.9829 | 0.429 | 5 |
| 65 | Salvianolic acid B                 | 1.7199  | -4.2854 | 2.4577 | 0.426 | 2 |
| 59 | Przewaquinone C                    | 1.7127  | -5.0802 | 0.0036 | 0.455 | 3 |
| 47 | Miltirone                          | 1.6982  | -1.3903 | 0      | 0.214 | 2 |
| 94 | 3-Hydroxymethylenetanshinquinone   | 1.609   | -5.1553 | 0.8405 | 0.464 | 2 |
| 5  | 15,16-Dihydrotanshinone I          | 1.4597  | -6.6285 | 3.6513 | 0.507 | 4 |
| 54 | Prolithospermic acid               | 1.3966  | -6.5959 | 2.2038 | 0.507 | 4 |
| 16 | Danshenxinkun D                    | 1.3698  | -9.0608 | 0.9152 | 0.415 | 5 |
| 52 | Nor-salvioxide                     | 1.2695  | -5.0081 | 0.9298 | 0.213 | 4 |
| 19 | Dihydroisotanshinone II            | 1.0809  | -2.9534 | 0.6968 | 0.28  | 2 |
| 79 | Tanshinaldehyde                    | 0.7592  | -6.7751 | 0.8588 | 0.429 | 2 |
| 7  | Ammonium-potassium lithospermate B | 0.4991  | -5.9303 | 1.3813 | 0.563 | 2 |
| 88 | Tanshinone IIB                     | 0.4287  | -7.0848 | 0.9944 | 0.453 | 4 |
| 75 | Sibiriquinone A                    | 0.3059  | -5.8454 | 0.6447 | 0.388 | 2 |
| 43 | Miltiodiol                         | 0.166   | -8.8386 | 1.0983 | 0.478 | 3 |
| 76 | Sibiriquinone B                    | 0.1483  | -8.0284 | 0.1522 | 0.425 | 2 |
| 44 | Miltionone I                       | -0.1404 | -9.132  | 1.8345 | 0.509 | 5 |
| 28 | Isocryptotanshinone                | -0.2517 | -1.9524 | 0.2248 | 0.174 | 2 |
| 81 | Tanshindiol B                      | -0.3428 | -7.9731 | 1.4426 | 0.501 | 5 |
| 11 | Cryptoacetalide                    | -0.379  | -5.3185 | 1.0311 | 0.247 | 2 |
| 34 | Isotanshinone IIB                  | -0.5395 | -8.1363 | 0.6295 | 0.455 | 4 |
| 80 | Tanshindiol A                      | -0.5969 | -8.3711 | 1.4418 | 0.562 | 3 |
| 82 | Tanshindiol C                      | -0.8565 | -7.8315 | 0.8776 | 0.425 | 5 |
| 27 | Hydroxytanshinone IIA              | -1.3262 | -8.2014 | 1.034  | 0.431 | 4 |
| 37 | Magnesium lithospermate B          | -2.1566 | -2.8616 | 1.3880 | 0.220 | 3 |
| 68 | Salvianolic acid E                 | -2.2926 | -3.4844 | 1.1539 | 0.204 | 2 |
| 70 | Salvianolic acid G                 | -2.4379 | -7.4452 | 0.2299 | 0.496 | 3 |

|    |                            |          |          |        |       |   |
|----|----------------------------|----------|----------|--------|-------|---|
| 45 | Miltionone II              | -2.8208  | -10.0377 | 1.0889 | 0.405 | 4 |
| 25 | Ferruginol                 | -3.8513  | -10.4627 | 0.0005 | 0.366 | 2 |
| 23 | Epidanshenspiroketalactone | -4.0021  | -7.6704  | 0.0685 | 0.226 | 2 |
| 78 | Sugiol                     | -4.9704  | -10.9129 | 0.0599 | 0.375 | 2 |
| 10 | Carnosol                   | -6.5732  | -11.6863 | 0      | 0.377 | 1 |
| 89 | Tigogenin                  | -13.2787 | -19.8064 | 0      | 0.384 | 5 |
| 35 | Lithospermate B            | -17.8161 | -22.7176 | 1.4625 | 0.538 | 3 |
| 46 | Miltipolone                | -23.9001 | -28.9125 | 0.2529 | 0.374 | 2 |
| 77 | Stigmasterol               | -25.2197 | -28.6903 | 0.0265 | 0.443 | 1 |
| 93 | $\beta$ -Sitosterol        | -27.5419 | -30.8643 | 0      | 0.35  | 2 |
| 17 | Daucosterol                | -35.5223 | -40.4018 | 0.0059 | 0.288 | 2 |
| 92 | Ursolic acid               | -48.7974 | -58.6257 | 0.0179 | 0.348 | 3 |

---
